# Supplementary material for: Endothelial pannexin 1–TRPV4 channel signaling lowers pulmonary arterial pressure in mice
Source: eLife. 2021 Sep 7;10:e67777. doi: 10.7554/eLife.67777 (PMC8448527; doi:10.7554/eLife.67777)
Supplement: Figure 2—figure supplement 2—source data 1. [file elife-67777-fig2-figsupp2-data1.xlsx]

## Sheet: Sheet1
U46619 (nM)	1	3	10	30	100		U46619 (nM)	1	3	10	30	100
Panx1fl/fl	0	6.82353	21.0588	31.1765	33.2941		Panx1fl/fl	12.8713	18.8119	41.5842	46.5346	57.4257
	0	-0.77519	18.2171	25.969	36.3566		plus	22.1053	30.5263	42.1053	50.5263	55.7895
	0	3.02417	19.6379	28.5727	34.8254		Apyrase	44.898	52.0408	67.3469	72.449	77.551
	-1.1215	5.1019	21.6179	31.0103	40.01		(10 U/mL)	8.62069	10.3448	28.4483	50	50
	1.3118	1.1923	17.1819	25.3123	29.0811			1.82648	2.73973	49.3151	63.9269	72.6027
