# Supplementary material for: Endothelial pannexin 1–TRPV4 channel signaling lowers pulmonary arterial pressure in mice
Source: eLife. 2021 Sep 7;10:e67777. doi: 10.7554/eLife.67777 (PMC8448527; doi:10.7554/eLife.67777)
Supplement: Figure 2—source data 1. [file elife-67777-fig2-data1.xlsx]

## Sheet: Fig. 2C_source data
	U46619 (nM)	1	3	10	30	100	300		U46619 (nM)	1	3	10	30	100	300
	TRPV4fl/fl	0	0	0	9	23	25		Endothelial	0	0	9	35	68	68
		0	0	0	13	24	26		TRPV4	0	6	20	30	38	40
		0	0	3	30	33	33		knockout	0	0	2	30	35	37
		0	0	1	13	33	33			0	1.5	9.75	32.5	51	52
		0	0	0	16	31	32			0	0	8	35	63	63
		0	0	2	28	34	34
