# Supplementary material for: Endothelial pannexin 1–TRPV4 channel signaling lowers pulmonary arterial pressure in mice
Source: eLife. 2021 Sep 7;10:e67777. doi: 10.7554/eLife.67777 (PMC8448527; doi:10.7554/eLife.67777)
Supplement: Figure 2—source data 2. [file elife-67777-fig2-data2.xlsx]

## Sheet: Fig 2E source data
Fig 2E	U46619 (nM)	1	3	10	30	100		U46619 (nM)	1	3	10	30	100		U46619 (nM)	1	3	10	30	100
	Panx1fl/fl	0	6.82353	21.0588	31.1765	33.2941		Endothelial	9.81595	34.9999	65.0307	76.0736	79.7546		Endothelial	0.5	4.78469	18.1818	32.5359	37.3206
		0	-0.77519	18.2171	25.969	36.3566		Panx1	13.0435	17.3913	23.4783	40.8696	52.1739		Panx1	16.8	49.5575	71.6814	75.2212	77.8761
		0	3.02417	19.6379	28.5727	34.8254		knockout	4.34783	18.2609	29.5652	50.4348	60.8696		knockout	12.7	19.8413	28.5714	39.6825	53.9682
		-1.1215	5.1019	21.6179	31.0103	40.01			17.4775	41.1043	49.6537	62.9256	69.686		plus	3.2456	6.30293	14.7563	20.7651	26.9383
		1.3118	1.1923	17.1819	25.3123	29.0811			42.7027	63.2432	80.5405	84.3243	85.9459		GSK101	2.84613	7.86134	15.0932	19.8736	24.9745
															(3 nM)	0.87623	2.86133	18.3954	20.9134	37.8613
