# Supplementary material for: Endothelial pannexin 1–TRPV4 channel signaling lowers pulmonary arterial pressure in mice
Source: eLife. 2021 Sep 7;10:e67777. doi: 10.7554/eLife.67777 (PMC8448527; doi:10.7554/eLife.67777)
Supplement: Figure 2—source data 3. [file elife-67777-fig2-data3.xlsx]

## Sheet: Fig 2G
		Shear stress (dynes/cm2)	4	7	14
	Panx1fl/fl		243	620	851
		ATP (nM)	532	793	447
			580	518	793
			383	433	860
			511	426	1103
	Panx1EC-/-		113	167	235
		ATP (nM)	98	211	80
			120	259	215
			230	280	371
			158	199	289
