# Supplementary material for: Endothelial pannexin 1–TRPV4 channel signaling lowers pulmonary arterial pressure in mice
Source: eLife. 2021 Sep 7;10:e67777. doi: 10.7554/eLife.67777 (PMC8448527; doi:10.7554/eLife.67777)
Supplement: Figure 2—source data 4. [file elife-67777-fig2-data4.xlsx]

## Sheet: Sheet1
	Shear stress (dynes/cm2)	4	7	14
TRPV4fl/fl		498	793	447
	ATP (nM)	586	518	793
		400	433	734
		511	426	950
		362	596	881
TRPV4EC-/-		658	732	932
		615	524	786
		573	583	618
		448	290	612
		318	716	563
