# Supplementary material for: Endothelial pannexin 1–TRPV4 channel signaling lowers pulmonary arterial pressure in mice
Source: eLife. 2021 Sep 7;10:e67777. doi: 10.7554/eLife.67777 (PMC8448527; doi:10.7554/eLife.67777)
Supplement: Figure 3—source data 1. [file elife-67777-fig3-data1.xlsx]

## Sheet: Sheet1
U46619 (nM)	1	3	10	30	100	300		U46619 (nM)	1	3	10	30	100	300		U46619 (nM)	1	3	10	30	100	300
P2Y2Rfl/fl	0.62472	1.23982	3.97432	15.9283	24.7512	30.9712		P2Y2REC-/-	2.97613	5.92567	17.6135	35.3197	46.7123	63.7513		P2Y2REC-/-	0.5	3.78469	18.1818	32.5359	37.3206	37.799
	1.98434	1.98472	4.97245	17.9125	20.8613	28.763			2.58624	7.23592	17.9357	29.7613	50.7513	67.6513		plus	12.7	19.8413	28.5714	39.6825	53.9682	65.873
	0	1.08925	3	14.0872	20.7514	32.7123			3.87134	8.61345	25.7613	29.6153	47.6513	47.8614		GSK101	0	0.173913	0.869565	6.08696	16.5217	24.3478
	0	1.88456	4.22397	18.5125	26.9713	34.9817			0.87624	5.08134	22.7614	35.9713	48.4413	59.7613		(3 nM)	0.8	2.30769	7.69231	13.0769	18.4615	23.0769
	0.09723	1.27546	5.92345	21.9724	30.9761	30.8714			3.66348	10.7523	29.9724	55.5134	59.5123	68.8613			-1	1.02041	4.08163	9.18367	14.2857	35.7143
	1.09554	1.98864	5.97234	17.9771	26.0861	30.9824			5.01275	12.2236	23.8651	62.7134	70.8635	71.0872
